# Supplementary material
Source: publisher figshare collection journal article supplement (https://gsapubs.figshare.com/ndownloader/files/22478357)
Supplement: Supplementary file 1 [file 22478357]

## Sheet: experiments
Szymanowski, D., Forni, F., Wolff, J.A., and Ellis, B.S., 2020, Modulation of zircon solubility by crystal–melt dynamics: Geology, v. 48, https://doi.org/10.1130/G47405.1
		oxide wt%															ppm	Oxide wt%/eq wt															Cation fractions
Sample	Reference	SiO2	TiO2	Al2O3	Cr2O3	V2O3	FeOt	MnO	MgO	CaO	SrO	BaO	Na2O	K2O	P2O5	Total	Zr	SiO2	TiO2	Al2O3	Cr2O3	V2O3	FeOt	MnO	MgO	CaO	SrO	BaO	Na2O	K2O	P2O5	Total	SiO2	TiO2	Al2O3	Cr2O3	V2O3	FeOt	MnO	MgO	CaO	SrO	BaO	Na2O	K2O	P2O5	Total	M	G
calibration experiments
1	W&H83	54.2	0.5	16.9			4.1		2	7.6			2.3	0.8		88.4	1320	0.902066	0.0062605	0.331498	0	0	0.0570662	0	0.0496224	0.135527	0	0	0.0742188	0.0169859	0	1.57324	0.573379	0.00397936	0.21071	0	0	0.0362729	0	0.0315414	0.0861449	0	0	0.0471756	0.0107967	0	1	1.90588	4.8618
2	W&H83	56.2	0.6	16.8			3.1		1.6	5.9			3.3	1.4		88.9	1340	0.935352	0.0075126	0.329537	0	0	0.0431476	0	0.0396979	0.105212	0	0	0.106488	0.0297253	0	1.59667	0.585814	0.00470516	0.20639	0	0	0.0270235	0	0.0248629	0.0658944	0	0	0.0666936	0.018617	0	1	1.79561	5.58103
3	W&H83	57.4	0.7	16.8			2.6		1.2	4.8			3.7	3		90.2	1260	0.955324	0.0087647	0.329537	0	0	0.0361883	0	0.0297734	0.085596	0	0	0.119395	0.063697	0	1.62828	0.586709	0.00538281	0.202384	0	0	0.0222249	0	0.0182852	0.0525685	0	0	0.0733263	0.0391193	0	1	1.83242	5.963
4	W&H83	58.8	0.6	17.1			3.6		1.4	2.6			1.5	3.3		88.9	600	0.978625	0.0075126	0.335421	0	0	0.0501069	0	0.0347357	0.0463645	0	0	0.0484036	0.0700667	0	1.57124	0.622838	0.00478133	0.213476	0	0	0.0318901	0	0.0221072	0.0295083	0	0	0.030806	0.0445933	0	1	1.01094	7.78061
5	W&H83	56.5	0.5	16.8			3.4		2.4	8.4			2.5	0.8		91.3	3150	0.940345	0.0062605	0.329537	0	0	0.0473232	0	0.0595468	0.149793	0	0	0.0806726	0.0169859	0	1.63046	0.576735	0.00383971	0.202112	0	0	0.0290244	0	0.0365214	0.0918714	0	0	0.0494783	0.0104178	0	1	2.09015	4.69619
6	W&H83	58.2	0.7	16.6			2.6		2.4	6.8			3.4	1.5		92.2	2780	0.968639	0.0087647	0.325614	0	0	0.0361883	0	0.0595468	0.121261	0	0	0.109715	0.0318485	0	1.66158	0.582964	0.00527493	0.195967	0	0	0.0217795	0	0.0358376	0.0729795	0	0	0.0660305	0.0191676	0	1	2.02341	5.06314
7	W&H83	58.4	0.7	16.1			2.2		1.5	5.6			3.7	3		91.2	3420	0.971968	0.0087647	0.315806	0	0	0.0306209	0	0.0372168	0.099862	0	0	0.119395	0.063697	0	1.64733	0.590026	0.00532055	0.191708	0	0	0.0185882	0	0.0225922	0.0606205	0	0	0.0724781	0.0386668	0	1	2.05447	5.57647
8	W&H83	61.6	0.8	17.7			2.8		1.4	2.8			1.4	3.6		92.1	1070	1.02523	0.0100168	0.347191	0	0	0.038972	0	0.0347357	0.049931	0	0	0.0451767	0.0764364	0	1.62769	0.629868	0.00615402	0.213303	0	0	0.0239432	0	0.0213405	0.0306761	0	0	0.0277552	0.0469602	0	1	1.01276	8.38196
9	W&H83	66.6	0.4	13.6			1.2		0.6	2.1			3.5	4		92	940	1.10844	0.0050084	0.266768	0	0	0.0167023	0	0.0148867	0.0374482	0	0	0.112942	0.0849293	0	1.64713	0.672955	0.00304069	0.161959	0	0	0.0101403	0	0.00903799	0.0227355	0	0	0.0685689	0.0515621	0	1	1.5194	8.98119
10	W&H83	63.8	0.4	14.2			1.6		0.8	3			3.5	3.6		90.9	1180	1.06184	0.0050084	0.278537	0	0	0.0222697	0	0.0198489	0.0534975	0	0	0.112942	0.0764364	0	1.63038	0.651284	0.00307192	0.170842	0	0	0.0136592	0	0.0121744	0.0328129	0	0	0.0692732	0.0468825	0	1	1.63375	7.77513
11	W&H83	58.9	0.7	15.8			4.1		1.4	5.6			2.2	0.9		89.6	870	0.980289	0.0087647	0.309922	0	0	0.0570662	0	0.0347357	0.099862	0	0	0.0709919	0.0191091	0	1.58074	0.620146	0.00554468	0.196061	0	0	0.0361009	0	0.0219743	0.0631742	0	0	0.0449105	0.0120887	0	1	1.50796	6.10513
12	W&H83	59.4	0.7	16.5			3.2		1.5	4.7			3.4	1.8		91.2	980	0.988611	0.0087647	0.323652	0	0	0.0445395	0	0.0372168	0.0838127	0	0	0.109715	0.0382182	0	1.63453	0.604829	0.00536222	0.198009	0	0	0.0272491	0	0.0227691	0.0512764	0	0	0.0671231	0.0233818	0	1	1.61201	6.15395
13	W&H83	59.4	0.6	17.2			2.3		0.8	4.4			3.6	3.3		91.6	880	0.988611	0.0075126	0.337383	0	0	0.0320127	0	0.0198489	0.078463	0	0	0.116169	0.0700667	0	1.65007	0.599134	0.00455291	0.204466	0	0	0.0194009	0	0.0120292	0.0475514	0	0	0.0704024	0.0424629	0	1	1.69766	6.68936
14	W&H83	64.2	0.6	17.8			3.7		1.6	1.8			1.6	3.8		95.1	460	1.0685	0.0075126	0.349152	0	0	0.0514988	0	0.0396979	0.0320985	0	0	0.0516305	0.0806828	0	1.68077	0.635719	0.00446973	0.207733	0	0	0.0306399	0	0.0236188	0.0190975	0	0	0.0307183	0.0480034	0	1	0.88533	8.40439
15	W&H83	68.1	0.1	13			1.1		0.1	1.2			3.4	4.2		91.2	300	1.13341	0.0012521	0.254999	0	0	0.0153104	0	0.00248112	0.021399	0	0	0.109715	0.0891758	0	1.62774	0.696308	0.000769227	0.156658	0	0	0.00940595	0	0.00152427	0.0131464	0	0	0.0674031	0.054785	0	1	1.36118	10.9344
16	W&H83	68.1	0.2	13			1		0.1	1.2			3.6	4.5		91.7	270	1.13341	0.0025042	0.254999	0	0	0.0139186	0	0.00248112	0.021399	0	0	0.116169	0.0955455	0	1.64042	0.690924	0.00152656	0.155447	0	0	0.00848475	0	0.00151249	0.0130448	0	0	0.0708162	0.0582444	0	1	1.44458	10.5524
19	W&H83	67.8	0.2	13			0.8		0.2	1.3			3.8	4.8		91.9	390	1.12841	0.0025042	0.254999	0	0	0.0111349	0	0.00496224	0.0231822	0	0	0.122622	0.101915	0	1.64973	0.683998	0.00151794	0.15457	0	0	0.00674949	0	0.0030079	0.0140521	0	0	0.0743286	0.0617767	0	1	1.55317	9.96985
20	W&H83	69.5	0.2	13.2			1.4		0.7	1.5			1.6	4.2		92.3	180	1.15671	0.0025042	0.258922	0	0	0.019486	0	0.0173678	0.0267487	0	0	0.0516305	0.0891758	0	1.62254	0.712898	0.00154338	0.159578	0	0	0.0120096	0	0.0107041	0.0164857	0	0	0.0318207	0.0549605	0	1	1.05265	11.53
21	W&H83	66.6	0.2	13.7			1.4			0.8			4.6	5.2		92.5	860	1.10844	0.0025042	0.268729	0	0	0.019486	0	0	0.014266	0	0	0.148438	0.110408	0	1.67227	0.662836	0.00149748	0.160697	0	0	0.0116524	0	0	0.0085309	0	0	0.0887639	0.0660227	0	1	1.61336	9.26329
22	W&H83	66.4	0.2	14.2			1.2			1.4			3.8	4.8		92	400	1.10511	0.0025042	0.278537	0	0	0.0167023	0	0	0.0249655	0	0	0.122622	0.101915	0	1.65236	0.668809	0.00151553	0.168569	0	0	0.0101081	0	0	0.015109	0	0	0.0742104	0.0616785	0	1	1.47335	9.89316
23	W&H83	66.9	0.4	13.8			1.4		0.2	1.4			3.5	4.9		92.5	410	1.11344	0.0050084	0.270691	0	0	0.019486	0	0.00496224	0.0249655	0	0	0.112942	0.104038	0	1.65553	0.672556	0.00302526	0.163507	0	0	0.0117703	0	0.00299737	0.0150801	0	0	0.0682209	0.062843	0	1	1.4661	9.62277
24	W&H83	68.5	0.4	13.3			1.9		0.8	1.6			1.7	4.2		92.4	320	1.14006	0.0050084	0.260883	0	0	0.0264453	0	0.0198489	0.028532	0	0	0.0548574	0.0891758	0	1.62482	0.701658	0.00308244	0.160562	0	0	0.0162759	0	0.0122161	0.0175601	0	0	0.0337622	0.0548836	0	1	1.09859	10.4288
25	W&H83	68.9	0.1	12.4			0.9			1			3.5	4.4		91.2	100	1.14672	0.0012521	0.24323	0	0	0.0125267	0	0	0.0178325	0	0	0.112942	0.0934222	0	1.62793	0.704406	0.000769138	0.149411	0	0	0.00769489	0	0	0.0109541	0	0	0.0693776	0.0573872	0	1	1.41263	11.3191
26	W&H83	69	0.1	12.6			1			1			3	4.6		91.3	180	1.14839	0.0012521	0.247153	0	0	0.0139186	0	0	0.0178325	0	0	0.0968071	0.0976687	0	1.62302	0.707562	0.000771464	0.15228	0	0	0.00857574	0	0	0.0109872	0	0	0.0596464	0.0601772	0	1	1.31602	11.7771
41	W&H83	67.4	0.5	15.2			2.3		0.7	1.6			2.4	4		94.1	1230	1.12176	0.0062605	0.298152	0	0	0.0320127	0	0.0173678	0.028532	0	0	0.0774457	0.0849293	0	1.66646	0.673139	0.00375677	0.178914	0	0	0.0192101	0	0.010422	0.0171213	0	0	0.0464733	0.050964	0	1	1.09338	9.86163
42	W&H83	67	0.4	14.7			2		0.8	3.1			3.6	3.9		95.5	1800	1.1151	0.0050084	0.288345	0	0	0.0278372	0	0.0198489	0.0552807	0	0	0.116169	0.0828061	0	1.71039	0.651955	0.00292821	0.168584	0	0	0.0162753	0	0.0116049	0.0323205	0	0	0.0679192	0.0484134	0	1	1.64658	7.64428
43	W&H83	61.4	0.7	17.7			3.4		1.9	4.9			2.6	2.4		95	1430	1.0219	0.0087647	0.347191	0	0	0.0473232	0	0.0471413	0.0873792	0	0	0.0838995	0.0509576	0	1.69455	0.603048	0.00517228	0.204886	0	0	0.0279266	0	0.0278193	0.0515647	0	0	0.0495113	0.0300714	0	1	1.47878	6.18875
44	W&H83	57.9	0.7	16.3			2.4		1.6	5.4			3.7	3		91	3210	0.963646	0.0087647	0.319729	0	0	0.0334046	0	0.0396979	0.0962955	0	0	0.119395	0.063697	0	1.64463	0.585935	0.00532928	0.194408	0	0	0.0203113	0	0.0241379	0.0585514	0	0	0.0725971	0.0387303	0	1	2.00535	5.53084
45	W&H83	60.3	0.7	17.3			3.1		1.5	2.7			1.5	3.4		90.5	1360	1.00359	0.0087647	0.339344	0	0	0.0431476	0	0.0372168	0.0481477	0	0	0.0484036	0.0721899	0	1.6008	0.626928	0.00547519	0.211984	0	0	0.0269537	0	0.0232488	0.0300772	0	0	0.030237	0.045096	0	1	1.01948	8.01131
FGE20	G16	63.74	0.36	15.2			0.04		0.26	4.07			3.89	4.37		91.93	1105	1.06084	0.00450756	0.298152	0	0	0.000556743	0	0.00645091	0.0725783	0	0	0.125527	0.0927853	0	1.6614	0.638523	0.00271311	0.179458	0	0	0.000335105	0	0.00388281	0.043685	0	0	0.0755547	0.0558476	0	1	1.9092	7.99013
FGE24	G16	58.99	1.14	18.35			0.03		1.99	3.86			4.53	2.85		91.74	1223	0.981787	0.0142739	0.35994	0	0	0.000417557	0	0.0493743	0.0688334	0	0	0.146179	0.0605121	0	1.68132	0.583939	0.00848974	0.214082	0	0	0.000248351	0	0.0293664	0.0409402	0	0	0.086943	0.0359909	0	1	1.63837	6.8554
FGE32	G16	56.67	1.05	18.52			0.06		1.02	3.64			4.25	5.42		90.63	1786	0.943175	0.0131471	0.363275	0	0	0.000835115	0	0.0253074	0.0649103	0	0	0.137143	0.115079	0	1.66287	0.567196	0.00790623	0.218462	0	0	0.000502212	0	0.0152191	0.039035	0	0	0.0824738	0.0692051	0	1	1.85414	6.85236
FGE33	G16	61.14	0.44	14.89			0.05		0.6	7.97			3.82	3.83		92.74	3252	1.01757	0.00550924	0.292072	0	0	0.000695929	0	0.0148867	0.142125	0	0	0.123268	0.0813198	0	1.67745	0.606619	0.0032843	0.174117	0	0	0.000414874	0	0.00887463	0.084727	0	0	0.0734854	0.0484783	0	1	2.75905	5.59873
FGE18	G16	64.42	0.1	14.55			0.01		1.79	4.64			3.05	2.02		90.58	3296	1.07216	0.0012521	0.285402	0	0	0.000139186	0	0.044412	0.0827428	0	0	0.0984206	0.0428893	0	1.62742	0.65881	0.000769378	0.175371	0	0	8.55255e-05	0	0.0272899	0.050843	0	0	0.0604765	0.0263542	0	1	1.63166	7.57905
FGE22	G16	63.88	0.41	14.56			0.03		1.79	5.59			3.66	4.03		93.95	4615	1.06317	0.00513361	0.285599	0	0	0.000417557	0	0.044412	0.0996837	0	0	0.118105	0.0855663	0	1.70209	0.624628	0.00301606	0.167793	0	0	0.000245321	0	0.0260927	0.0585655	0	0	0.0693881	0.0502713	0	1	2.25927	6.05471
FGE26	G16	52.82	0.5	15.2			0.01		5.32	9.26			3.67	1.74		88.52	10619	0.879098	0.0062605	0.298152	0	0	0.000139186	0	0.131996	0.165129	0	0	0.118427	0.0369442	0	1.63615	0.537298	0.00382637	0.182228	0	0	8.50693e-05	0	0.0806746	0.100926	0	0	0.0723819	0.02258	0	1	3.03146	3.53735
FGE27	G16	65.51	0.36	14.81			0.04		2.89	8.14			2.8	1.2		95.75	4961	1.0903	0.00450756	0.290502	0	0	0.000556743	0	0.0717043	0.145157	0	0	0.0903533	0.0254788	0	1.71856	0.634427	0.00262287	0.169038	0	0	0.000323959	0	0.0417235	0.084464	0	0	0.052575	0.0148257	0	1	2.20369	5.54257
FGE31	G16	77.28	0.41	10.82			0.01		0.44	0.76			2.18	3.77		95.67	1393	1.28619	0.00513361	0.212237	0	0	0.000139186	0	0.0109169	0.0135527	0	0	0.0703465	0.0800459	0	1.67857	0.766245	0.00305833	0.12644	0	0	8.29195e-05	0	0.00650372	0.00807398	0	0	0.0419087	0.0476871	0	1	1.09145	16.0768
FGE35	G16	59.47	0.78	13.04			0.05		1.95	9.46			3.38	3.66		91.79	12178	0.989776	0.00976638	0.255783	0	0	0.000695929	0	0.0483818	0.168695	0	0	0.109069	0.0777103	0	1.65988	0.596294	0.00588379	0.154098	0	0	0.000419265	0	0.0291478	0.101631	0	0	0.0657093	0.0468169	0	1	3.43669	4.41393
FGE36	G16	75.04	0.22	11.7			0.01		0.43	0.76			3.66	4.21		96.03	2005	1.24891	0.00275462	0.229499	0	0	0.000139186	0	0.0106688	0.0135527	0	0	0.118105	0.0893881	0	1.71302	0.729071	0.00160805	0.133973	0	0	8.12518e-05	0	0.00622808	0.00791159	0	0	0.0689454	0.0521816	0	1	1.40209	12.4362
FGE37	G16	54.11	2.11	15.75			0.06		2.98	5.81			3.96	5.55		90.33	10905	0.900568	0.0264193	0.308941	0	0	0.000835115	0	0.0739373	0.103607	0	0	0.127785	0.117839	0	1.65993	0.542533	0.0159159	0.186116	0	0	0.000503102	0	0.0445424	0.0624163	0	0	0.0769823	0.0709905	0	1	2.70173	4.52861
FGE40-R	G16	64.6	0.9	14.68			0.19		2.3	5.07			2.02	2.81		92.57	4138	1.07516	0.0112689	0.287952	0	0	0.00264453	0	0.0570657	0.0904108	0	0	0.0651835	0.0596628	0	1.64934	0.651869	0.00683235	0.174586	0	0	0.00160338	0	0.034599	0.0548162	0	0	0.0395208	0.0361737	0	1	1.62843	7.09069
FGE41-R	G16	71.33	0.26	12.06			0.01		0.86	0.62			2.34	3.35		90.83	1871	1.18717	0.00325546	0.23656	0	0	0.000139186	0	0.0213376	0.0110561	0	0	0.0755096	0.0711283	0	1.60615	0.739136	0.00202687	0.147284	0	0	8.66579e-05	0	0.0132849	0.00688362	0	0	0.0470127	0.0442849	0	1	0.965112	14.5676
W&H83	Watson & Harrison 1983
B13	Boehnke et al 2013
G16	Gervasoni et al 2016
[truncated: 3 more columns]

## Sheet: Data Fig. 3
			oxide wt%															ppm	ppm	Oxide wt%/eq wt															Cation fractions
Sample	Composition	Reference	SiO2	TiO2	Al2O3	Cr2O3	V2O3	FeOt	MnO	MgO	CaO	SrO	BaO	Na2O	K2O	P2O5	Total	Zr	Ba	SiO2	TiO2	Al2O3	Cr2O3	V2O3	FeOt	MnO	MgO	CaO	SrO	BaO	Na2O	K2O	P2O5	Total	SiO2	TiO2	Al2O3	Cr2O3	V2O3	FeOt	MnO	MgO	CaO	SrO	BaO	Na2O	K2O	P2O5	Total
Campanian Ignimbrite
VOS1_gl3	phonolite	Forni et al. 2016	61.15	0.43	18.62			3.29	0.21	0.5	2.07			5.87	7.78	0.08	100	631	12.8	1.01774	0.00538403	0.365237	0	0	0.0457921	0.00296036	0.0124056	0.0369133	0	0	0.189419	0.165187	0.0011272	1.84216	0.552468	0.00292267	0.198265	0	0	0.0248578	0.001607	0.00673425	0.020038	0	0	0.102824	0.0896704	0.00061189	1
VOS1_gl14	phonolite	Forni et al. 2016	61.48	0.45	18.79			3.13	0.24	0.33	1.7			6.2	7.64	0.04	100	631	12.8	1.02323	0.00563445	0.368571	0	0	0.0435652	0.00338326	0.00818769	0.0303152	0	0	0.200068	0.162215	0.000563601	1.84573	0.554376	0.00305269	0.199688	0	0	0.0236032	0.00183302	0.00443601	0.0164245	0	0	0.108395	0.0878865	0.000305353	1
VOS1_gl15	phonolite	Forni et al. 2016	61.58	0.48	18.56			3.17	0.24	0.44	1.94			6.21	7.35	0.02	99.99	631	12.8	1.02489	0.00601008	0.36406	0	0	0.0441219	0.00338326	0.0109169	0.034595	0	0	0.200391	0.156058	0.0002818	1.84471	0.555585	0.00325801	0.197353	0	0	0.0239181	0.00183404	0.00591796	0.0187536	0	0	0.10863	0.0845973	0.000152761	1
VOS1_gl16	phonolite	Forni et al. 2016	61.76	0.45	18.62			3.1	0.22	0.34	1.87			6.16	7.41	0.06	99.99	631	12.8	1.02789	0.00563445	0.365237	0	0	0.0431476	0.00310133	0.0084358	0.0333468	0	0	0.198777	0.157332	0.000845401	1.84375	0.5575	0.00305598	0.198095	0	0	0.0234021	0.00168208	0.00457536	0.0180864	0	0	0.107812	0.0853325	0.000458523	1
VOS2_gl3	phonolite	Forni et al. 2016	61.79	0.46	18.76			3.13	0.18	0.34	1.81			6.12	7.38	0.04	100.01	648	12.8	1.02839	0.00575966	0.367983	0	0	0.0435652	0.00253745	0.0084358	0.0322768	0	0	0.197487	0.156695	0.000563601	1.84369	0.557788	0.00312398	0.19959	0	0	0.0236293	0.00137629	0.0045755	0.0175066	0	0	0.107115	0.0849896	0.000305691	1
VOS2_gl6	phonolite	Forni et al. 2016	61.57	0.46	19			3.08	0.22	0.31	1.74			6.18	7.4	0.03	99.99	648	12.8	1.02473	0.00575966	0.37269	0	0	0.0428692	0.00310133	0.00769147	0.0310285	0	0	0.199423	0.157119	0.0004227	1.84483	0.555458	0.00312205	0.202019	0	0	0.0232375	0.00168109	0.0041692	0.0168192	0	0	0.108098	0.0851672	0.000229127	1
VOS2_gl7	phonolite	Forni et al. 2016	61.71	0.45	18.79			3.12	0.22	0.35	1.75			6.22	7.35	0.03	99.99	648	12.8	1.02706	0.00563445	0.368571	0	0	0.043426	0.00310133	0.00868392	0.0312069	0	0	0.200713	0.156058	0.0004227	1.84487	0.556708	0.00305411	0.199781	0	0	0.0235387	0.00168105	0.00470705	0.0169154	0	0	0.108795	0.0845898	0.000229122	1
VOS2_gl8	phonolite	Forni et al. 2016	61.41	0.48	18.95			3.07	0.24	0.36	1.74			6.29	7.42	0.04	100	648	12.8	1.02206	0.00601008	0.37171	0	0	0.04273	0.00338326	0.00893203	0.0310285	0	0	0.202972	0.157544	0.000563601	1.84694	0.553383	0.00325408	0.201257	0	0	0.0231356	0.00183182	0.00483613	0.0168	0	0	0.109897	0.0853	0.000305154	1
VOS2_gl10	phonolite	Forni et al. 2016	61.8	0.46	18.71			3.1	0.23	0.36	1.78			6.15	7.36	0.05	100	648	12.8	1.02855	0.00575966	0.367002	0	0	0.0431476	0.0032423	0.00893203	0.0317418	0	0	0.198455	0.15627	0.000704501	1.84381	0.557842	0.00312378	0.199046	0	0	0.0234013	0.00175848	0.00484433	0.0172154	0	0	0.107633	0.0847538	0.00038209	1
VOS2_gl12	phonolite	Forni et al. 2016	61.55	0.44	19.08			3.1	0.22	0.35	1.68			6.17	7.37	0.03	99.99	648	12.8	1.02439	0.00550924	0.37426	0	0	0.0431476	0.00310133	0.00868392	0.0299586	0	0	0.1991	0.156482	0.0004227	1.84506	0.555209	0.00298594	0.202844	0	0	0.0233855	0.00168088	0.00470658	0.0162372	0	0	0.10791	0.0848115	0.000229099	1
VOS2_gl15	phonolite	Forni et al. 2016	61.84	0.45	18.7			2.91	0.22	0.33	1.75			6.29	7.47	0.04	100	648	12.8	1.02922	0.00563445	0.366806	0	0	0.0405031	0.00310133	0.00818769	0.0312069	0	0	0.202972	0.158605	0.000563601	1.8468	0.557299	0.00305092	0.198617	0	0	0.0219315	0.0016793	0.00443345	0.0168978	0	0	0.109905	0.0858812	0.000305177	1
VOS2_gl18	phonolite	Forni et al. 2016	61.6	0.45	18.89			3.12	0.24	0.31	1.67			6.29	7.39	0.05	100.01	648	12.8	1.02523	0.00563445	0.370533	0	0	0.043426	0.00338326	0.00769147	0.0297803	0	0	0.202972	0.156907	0.000704501	1.84626	0.5553	0.00305182	0.200694	0	0	0.0235211	0.0018325	0.00416598	0.0161301	0	0	0.109937	0.0849864	0.000381583	1
VOS2_gl19	phonolite	Forni et al. 2016	61.4	0.44	19.08			3.03	0.21	0.35	1.68			6.3	7.49	0.04	100.02	648	12.8	1.0219	0.00550924	0.37426	0	0	0.0421733	0.00296036	0.00868392	0.0299586	0	0	0.203295	0.15903	0.000563601	1.84833	0.552876	0.00298066	0.202485	0	0	0.022817	0.00160164	0.00469825	0.0162085	0	0	0.109988	0.0860398	0.000304924	1
VOS2_gl22	phonolite	Forni et al. 2016	61.04	0.49	19.45			3	0.22	0.35	1.65			6.26	7.53	0.02	100.01	648	12.8	1.01591	0.00613529	0.381517	0	0	0.0417557	0.00310133	0.00868392	0.0294236	0	0	0.202004	0.159879	0.0002818	1.84869	0.549528	0.00331873	0.206372	0	0	0.0225867	0.00167758	0.00469734	0.0159159	0	0	0.109269	0.0864826	0.000152433	1
VOS2_gl24	phonolite	Forni et al. 2016	61.28	0.47	19.03			3.1	0.25	0.35	1.71			6.35	7.4	0.05	99.99	648	12.8	1.0199	0.00588487	0.373279	0	0	0.0431476	0.00352423	0.00868392	0.0304936	0	0	0.204908	0.157119	0.000704501	1.84765	0.552	0.00318507	0.202029	0	0	0.0233527	0.00190742	0.00469999	0.016504	0	0	0.110902	0.0850375	0.000381296	1
PRO1-3_gl1	phonolite	Forni et al. 2016	62.17	0.45	18.62			2.84	0.18	0.37	1.55			6.25	7.52	0.05	100	566	16	1.03471	0.00563445	0.365237	0	0	0.0395288	0.00253745	0.00918014	0.0276404	0	0	0.201682	0.159667	0.000704501	1.84652	0.560357	0.00305138	0.197797	0	0	0.0214071	0.00137418	0.00497158	0.0149689	0	0	0.109222	0.086469	0.000381528	1
PRO1-3_gl2	phonolite	Forni et al. 2016	61.59	0.46	18.79			3.05	0.25	0.32	1.67			6.33	7.48	0.06	100	566	16	1.02506	0.00575966	0.368571	0	0	0.0424517	0.00352423	0.00793958	0.0297803	0	0	0.204263	0.158818	0.000845401	1.84701	0.554983	0.00311837	0.19955	0	0	0.022984	0.00190807	0.00429861	0.0161235	0	0	0.110591	0.0859863	0.000457713	1
PRO1-3_gl3	phonolite	Forni et al. 2016	61.6	0.44	18.86			2.95	0.23	0.33	1.61			6.47	7.46	0.05	100	566	16	1.02523	0.00550924	0.369944	0	0	0.0410598	0.0032423	0.00818769	0.0287103	0	0	0.208781	0.158393	0.000704501	1.84976	0.554249	0.00297836	0.199996	0	0	0.0221974	0.00175282	0.00442636	0.0155211	0	0	0.112869	0.0856291	0.000380861	1
PRO1-3_gl4	phonolite	Forni et al. 2016	61.65	0.47	18.79			2.92	0.23	0.32	1.61			6.52	7.42	0.06	99.99	566	16	1.02606	0.00588487	0.368571	0	0	0.0406423	0.0032423	0.00793958	0.0287103	0	0	0.210394	0.157544	0.000845401	1.84983	0.554676	0.0031813	0.199246	0	0	0.0219708	0.00175275	0.00429205	0.0155205	0	0	0.113737	0.0851666	0.000457015	1
PRO1-3_gl5	phonolite	Forni et al. 2016	61.64	0.46	18.83			2.99	0.22	0.34	1.55			6.53	7.41	0.03	100	566	16	1.02589	0.00575966	0.369356	0	0	0.0416166	0.00310133	0.0084358	0.0276404	0	0	0.210717	0.157332	0.0004227	1.85027	0.554454	0.00311287	0.199622	0	0	0.0224921	0.00167615	0.00455922	0.0149385	0	0	0.113884	0.0850315	0.000228453	1
PRO1-3_gl6	phonolite	Forni et al. 2016	61.54	0.45	18.93			3.01	0.23	0.32	1.52			6.35	7.62	0.04	100.01	566	16	1.02423	0.00563445	0.371317	0	0	0.0418949	0.0032423	0.00793958	0.0271054	0	0	0.204908	0.16179	0.000563601	1.84862	0.554049	0.00304792	0.200861	0	0	0.0226628	0.0017539	0.00429486	0.0146625	0	0	0.110844	0.0875193	0.000304876	1
PRO1-3_gl7	phonolite	Forni et al. 2016	61.52	0.45	18.75			3.05	0.2	0.34	1.6			6.4	7.64	0.05	100	566	16	1.02389	0.00563445	0.367787	0	0	0.0424517	0.00281939	0.0084358	0.028532	0	0	0.206522	0.162215	0.000704501	1.849	0.553757	0.0030473	0.198912	0	0	0.0229593	0.00152482	0.00456237	0.0154311	0	0	0.111694	0.0877314	0.000381018	1
PRO1-3_gl8	phonolite	Forni et al. 2016	61.9	0.46	18.76			2.94	0.22	0.33	1.36			6.23	7.75	0.05	100	566	16	1.03022	0.00575966	0.367983	0	0	0.0409206	0.00310133	0.00818769	0.0242522	0	0	0.201036	0.164551	0.000704501	1.84671	0.557866	0.00311887	0.199263	0	0	0.0221586	0.00167937	0.00443365	0.0131326	0	0	0.108862	0.0891045	0.000381489	1
PRO1-3_gl9	phonolite	Forni et al. 2016	61.6	0.49	18.9			2.99	0.22	0.35	1.45			6.48	7.48	0.05	100.01	566	16	1.02523	0.00613529	0.370729	0	0	0.0416166	0.00310133	0.00868392	0.0258571	0	0	0.209103	0.158818	0.000704501	1.84998	0.554184	0.00331642	0.200397	0	0	0.0224957	0.00167642	0.00469407	0.013977	0	0	0.11303	0.0858486	0.000380816	1
PRO1-3_gl10	phonolite	Forni et al. 2016	62.21	0.44	18.68			2.98	0.24	0.32	1.04			6.39	7.63	0.06	99.99	566	16	1.03538	0.00550924	0.366414	0	0	0.0414774	0.00338326	0.00793958	0.0185458	0	0	0.206199	0.162003	0.000845401	1.84769	0.560362	0.00298168	0.198308	0	0	0.0224482	0.00183107	0.00429702	0.0100373	0	0	0.111598	0.0876782	0.000457544	1
PRO1-3_gl11	phonolite	Forni et al. 2016	61.82	0.45	18.61			3.03	0.23	0.32	1.52			6.54	7.43	0.05	100	566	16	1.02889	0.00563445	0.36504	0	0	0.0421733	0.0032423	0.00793958	0.0271054	0	0	0.21104	0.157756	0.000704501	1.84952	0.556299	0.00304643	0.19737	0	0	0.0228023	0.00175304	0.00429277	0.0146553	0	0	0.114105	0.0852956	0.000380909	1
PRO1-3_gl12	phonolite	Forni et al. 2016	61.85	0.44	18.7			3.01	0.19	0.37	1.56			6.18	7.61	0.08	99.99	566	16	1.02939	0.00550924	0.366806	0	0	0.0418949	0.00267842	0.00918014	0.0278187	0	0	0.199423	0.161578	0.0011272	1.8454	0.557812	0.00298539	0.198767	0	0	0.0227023	0.0014514	0.0049746	0.0150746	0	0	0.108065	0.0875571	0.000610816	1
PRO1-3_gl13	phonolite	Forni et al. 2016	61.35	0.45	18.88			3	0.25	0.35	1.89			6.38	7.41	0.04	100	566	16	1.02107	0.00563445	0.370337	0	0	0.0417557	0.00352423	0.00868392	0.0337034	0	0	0.205877	0.157332	0.000563601	1.84848	0.552382	0.00304816	0.200347	0	0	0.0225893	0.00190656	0.00469788	0.0182331	0	0	0.111376	0.0851142	0.0003049	1
PRO1-3_gl14	phonolite	Forni et al. 2016	61.76	0.47	18.92			3	0.23	0.33	1.36			6.35	7.52	0.06	100	566	16	1.02789	0.00588487	0.371121	0	0	0.0417557	0.0032423	0.00818769	0.0242522	0	0	0.204908	0.159667	0.000845401	1.84775	0.556291	0.00318488	0.20085	0	0	0.0225981	0.00175472	0.00443116	0.0131252	0	0	0.110896	0.0864114	0.000457529	1
PRO1-3_gl15	phonolite	Forni et al. 2016	61.75	0.44	18.77			3.05	0.25	0.3	1.55			6.37	7.48	0.03	99.99	566	16	1.02772	0.00550924	0.368179	0	0	0.0424517	0.00352423	0.00744336	0.0276404	0	0	0.205554	0.158818	0.0004227	1.84726	0.556348	0.00298238	0.19931	0	0	0.0229808	0.00190781	0.00402939	0.0149629	0	0	0.111275	0.0859746	0.000228825	1
PRO1-3_gl16	phonolite	Forni et al. 2016	61.46	0.46	18.89			3.03	0.23	0.32	1.6			6.34	7.63	0.05	100.01	566	16	1.0229	0.00575966	0.370533	0	0	0.0421733	0.0032423	0.00793958	0.028532	0	0	0.204586	0.162003	0.000704501	1.84837	0.553405	0.00311608	0.200465	0	0	0.0228165	0.00175414	0.00429545	0.0154363	0	0	0.110684	0.0876463	0.000381147	1
PRO1-3_gl17	phonolite	Forni et al. 2016	61.76	0.46	18.79			3.01	0.21	0.32	1.46			6.26	7.71	0.04	100.02	566	16	1.02789	0.00575966	0.368571	0	0	0.0418949	0.00296036	0.00793958	0.0260354	0	0	0.202004	0.163701	0.000563601	1.84732	0.556422	0.00311785	0.199517	0	0	0.0226788	0.00160251	0.00429789	0.0140936	0	0	0.10935	0.0886155	0.000305091	1
PRO1-3_gl18	phonolite	Forni et al. 2016	61.66	0.44	18.78			2.95	0.23	0.37	1.62			6.32	7.6	0.05	100.02	566	16	1.02622	0.00550924	0.368375	0	0	0.0410598	0.0032423	0.00918014	0.0288886	0	0	0.20394	0.161366	0.000704501	1.84849	0.555169	0.0029804	0.199284	0	0	0.0222126	0.00175402	0.00496629	0.0156282	0	0	0.110328	0.0872959	0.000381122	1
PRO1-3_gl19	phonolite	Forni et al. 2016	61.65	0.46	18.78			3.06	0.23	0.34	1.62			6.34	7.5	0.03	100.01	566	16	1.02606	0.00575966	0.368375	0	0	0.0425909	0.0032423	0.0084358	0.0288886	0	0	0.204586	0.159242	0.0004227	1.8476	0.555346	0.00311737	0.19938	0	0	0.023052	0.00175487	0.00456581	0.0156358	0	0	0.11073	0.0861887	0.000228783	1
PRO1-3_gl20	phonolite	Forni et al. 2016	61.68	0.45	18.89			3	0.17	0.35	1.63			6.28	7.53	0.02	100	566	16	1.02656	0.00563445	0.370533	0	0	0.0417557	0.00239648	0.00868392	0.029067	0	0	0.20265	0.159879	0.0002818	1.84744	0.555665	0.00304987	0.200566	0	0	0.022602	0.00129719	0.00470052	0.0157337	0	0	0.109692	0.0865411	0.000152536	1
PRO1-3_gl21	phonolite	Forni et al. 2016	61.8	0.45	18.93			2.99	0.23	0.3	1.47			6.41	7.39	0.04	100.01	566	16	1.02855	0.00563445	0.371317	0	0	0.0416166	0.0032423	0.00744336	0.0262138	0	0	0.206845	0.156907	0.000563601	1.84834	0.556476	0.00304839	0.200893	0	0	0.0225157	0.00175417	0.00402705	0.0141823	0	0	0.111908	0.0848908	0.000304923	1
PRO1-3_gl22	phonolite	Forni et al. 2016	61.75	0.48	18.69			3.04	0.22	0.31	1.53			6.4	7.53	0.04	99.99	566	16	1.02772	0.00601008	0.36661	0	0	0.0423125	0.00310133	0.00769147	0.0272837	0	0	0.206522	0.159879	0.000563601	1.8477	0.556218	0.00325274	0.198414	0	0	0.0229001	0.00167848	0.00416273	0.0147663	0	0	0.111773	0.086529	0.000305029	1
PRO1-3_gl23	phonolite	Forni et al. 2016	62.09	0.45	18.68			2.89	0.22	0.32	1.56			6.27	7.48	0.04	100	566	16	1.03338	0.00563445	0.366414	0	0	0.0402247	0.00310133	0.00793958	0.0278187	0	0	0.202327	0.158818	0.000563601	1.84622	0.559728	0.00305188	0.198467	0	0	0.0217876	0.00167982	0.00430045	0.0150679	0	0	0.10959	0.0860231	0.000305272	1
PRO1-3_gl24	phonolite	Forni et al. 2016	61.49	0.48	18.68			2.97	0.21	0.33	1.87			6.37	7.52	0.07	99.99	566	16	1.0234	0.00601008	0.366414	0	0	0.0413382	0.00296036	0.00818769	0.0333468	0	0	0.205554	0.159667	0.000986301	1.84786	0.553828	0.00325246	0.198291	0	0	0.0223709	0.00160205	0.00443091	0.0180462	0	0	0.111239	0.0864065	0.000533753	1
PRO1-3_gl25	phonolite	Forni et al. 2016	61.72	0.46	18.72			2.97	0.25	0.35	1.7			6.27	7.49	0.06	99.99	566	16	1.02722	0.00575966	0.367198	0	0	0.0413382	0.00352423	0.00868392	0.0303152	0	0	0.202327	0.15903	0.000845401	1.84625	0.556385	0.00311966	0.198889	0	0	0.0223904	0.00190887	0.00470355	0.0164199	0	0	0.109588	0.086137	0.000457903	1
PRO2-1_gl11	trachyte	Forni et al. 2016	61.09	0.42	18.64			3.26	0.1	0.81	2.59			2.96	9.98	0.14	99.99	170	579	1.01674	0.00525882	0.365629	0	0	0.0453746	0.00140969	0.0200971	0.0461862	0	0	0.0955164	0.211899	0.0019726	1.81008	0.561709	0.0029053	0.201996	0	0	0.0250677	0.000778801	0.0111029	0.0255161	0	0	0.0527691	0.117066	0.00108979	1
PRO2-1_gl12	trachyte	Forni et al. 2016	61.38	0.39	18.46			3.18	0.09	0.73	2.42			2.99	10.18	0.18	100	170	579	1.02156	0.00488319	0.362098	0	0	0.0442611	0.00126872	0.0181122	0.0431546	0	0	0.0964844	0.216145	0.0025362	1.81051	0.564242	0.00269714	0.199998	0	0	0.0244468	0.000700756	0.0100039	0.0238356	0	0	0.0532914	0.119384	0.00140082	1
PRO2-1_gl13	trachyte	Forni et al. 2016	60.8	0.41	18.66			3.5	0.12	0.78	2.47			2.98	10.15	0.13	100	170	579	1.01191	0.00513361	0.366021	0	0	0.048715	0.00169163	0.0193527	0.0440463	0	0	0.0961618	0.215508	0.0018317	1.81037	0.558952	0.00283566	0.20218	0	0	0.0269088	0.000934411	0.0106899	0.0243299	0	0	0.0531171	0.119041	0.00101178	1
PRO2-1_gl14	trachyte	Forni et al. 2016	61.32	0.4	18.38			3.4	0.12	0.71	2.53			2.98	10.01	0.16	100.01	170	579	1.02057	0.0050084	0.360529	0	0	0.0473232	0.00169163	0.0176159	0.0451162	0	0	0.0961618	0.212536	0.0022544	1.8088	0.564222	0.00276891	0.199319	0	0	0.0261627	0.000935222	0.00973901	0.0249426	0	0	0.0531632	0.117501	0.00124635	1
PRO2-1_gl16	trachyte	Forni et al. 2016	60.96	0.42	18.32			3.59	0.09	0.77	2.62			2.85	10.25	0.14	100.01	170	579	1.01457	0.00525882	0.359352	0	0	0.0499677	0.00126872	0.0191046	0.0467211	0	0	0.0919668	0.217631	0.0019726	1.80782	0.561215	0.00290893	0.198777	0	0	0.0276398	0.000701799	0.0105678	0.0258439	0	0	0.0508717	0.120383	0.00109115	1
PRO2-1_gl19	trachyte	Forni et al. 2016	61.14	0.42	18.38			3.44	0.09	0.76	2.57			3.03	10	0.16	99.99	170	579	1.01757	0.00525882	0.360529	0	0	0.0478799	0.00126872	0.0188565	0.0458295	0	0	0.0977752	0.212323	0.0022544	1.80955	0.562335	0.00290616	0.199237	0	0	0.0264596	0.000701129	0.0104206	0.0253265	0	0	0.054033	0.117335	0.00124584	1
PRO2-1_gl21	trachyte	Forni et al. 2016	61.15	0.41	18.43			3.35	0.13	0.73	2.5			3.11	10.03	0.15	99.99	170	579	1.01774	0.00513361	0.36151	0	0	0.0466272	0.0018326	0.0181122	0.0445812	0	0	0.100357	0.21296	0.0021135	1.81096	0.561986	0.00283474	0.199623	0	0	0.0257472	0.00101195	0.0100014	0.0246174	0	0	0.0554162	0.117595	0.00116706	1
PRO2-1_gl23	trachyte	Forni et al. 2016	60.69	0.41	18.54			3.54	0.09	0.75	2.55			3.22	10.05	0.17	100.01	170	579	1.01008	0.00513361	0.363667	0	0	0.0492718	0.00126872	0.0186084	0.0454729	0	0	0.103906	0.213385	0.0023953	1.81319	0.557074	0.00283126	0.200568	0	0	0.0271741	0.000699719	0.0102628	0.0250789	0	0	0.0573058	0.117685	0.00132104	1
PRO1-4_gl1_2	trachyte	Forni et al. 2016	59.835	0.422	19.11			3.57	0.075	0.736	2.593			3.283	10.196	0.179	99.999	180	617	0.995851	0.00528386	0.374848	0	0	0.0496893	0.00105727	0.018261	0.0462397	0	0	0.105939	0.216485	0.00252211	1.81618	0.548323	0.00290933	0.206394	0	0	0.0273593	0.000582141	0.0100547	0.0254599	0	0	0.0583309	0.119198	0.00138869	1
PRO1-4_gl2_1	trachyte	Forni et al. 2016	60.66	0.332	19.026			3.346	0.095	0.784	2.363			3.293	10.037	0.064	100	180	617	1.00958	0.00415697	0.3732	0	0	0.0465716	0.00133921	0.019452	0.0421382	0	0	0.106262	0.213109	0.000901761	1.81671	0.555719	0.00228818	0.205426	0	0	0.0256351	0.000737161	0.0107072	0.0231947	0	0	0.0584914	0.117305	0.00049637	1
PRO1-4_gl4_1	trachyte	Forni et al. 2016	59.804	0.415	18.995			3.544	0.134	0.84	2.841			3.036	10.213	0.177	99.999	180	617	0.995335	0.00519622	0.372592	0	0	0.0493275	0.00188899	0.0208414	0.0506621	0	0	0.0979688	0.216846	0.00249393	1.81315	0.548953	0.00286585	0.205494	0	0	0.0272054	0.00104183	0.0114946	0.0279415	0	0	0.0540323	0.119596	0.00137547	1
PRO1-4_gl5_1	trachyte	Forni et al. 2016	60.574	0.344	19.291			3.365	0.044	0.731	2.352			3.077	10.011	0.21	99.999	180	617	1.00815	0.00430723	0.378398	0	0	0.046836	0.000620265	0.018137	0.041942	0	0	0.0992919	0.212557	0.0029589	1.8132	0.556006	0.00237548	0.208691	0	0	0.0258306	0.000342083	0.0100028	0.0231315	0	0	0.0547606	0.117228	0.00163187	1
PRO1-4_gl6_1	trachyte	Forni et al. 2016	60.468	0.399	19.43			3.075	0.015	0.72	2.498			3.235	10.018	0.143	100.001	180	617	1.00639	0.00499588	0.381125	0	0	0.0427996	0.000211454	0.0178641	0.0445456	0	0	0.10439	0.212705	0.00201487	1.81704	0.553861	0.00274946	0.209751	0	0	0.0235546	0.000116373	0.00983141	0.0245155	0	0	0.0574508	0.117062	0.00110888	1
PRO1-4_gl7_2	trachyte	Forni et al. 2016	59.93	0.439	19.139			3.316	0.07	0.754	2.685			3.108	10.417	0.142	100	180	617	0.997432	0.00549672	0.375417	0	0	0.046154	0.000986786	0.0187076	0.0478803	0	0	0.100292	0.221177	0.00200078	1.81554	0.549384	0.00302759	0.206779	0	0	0.0254216	0.00054352	0.0103041	0.0263724	0	0	0.0552408	0.121824	0.00110203	1
PRO1-4_gl7_3	trachyte	Forni et al. 2016	59.849	0.308	19.125			3.59	0.125	0.724	2.678			3.111	10.395	0.095	100	180	617	0.996084	0.00385647	0.375142	0	0	0.0499677	0.00176212	0.0179633	0.0477554	0	0	0.100389	0.22071	0.00133855	1.81497	0.548816	0.00212481	0.206694	0	0	0.0275309	0.00097088	0.00989731	0.026312	0	0	0.0553117	0.121605	0.000737507	1
PRO1-4_gl8_1	trachyte	Forni et al. 2016	59.864	0.283	19.127			3.472	0.11	0.827	2.68			3.107	10.399	0.13	99.999	180	617	0.996333	0.00354344	0.375182	0	0	0.0483253	0.00155066	0.0205189	0.0477911	0	0	0.10026	0.220795	0.0018317	1.81613	0.548602	0.0019511	0.206583	0	0	0.0266089	0.000853828	0.0112981	0.0263148	0	0	0.0552052	0.121574	0.00100857	1
PRO1-4_gl9_1	trachyte	Forni et al. 2016	59.698	0.481	19.084			3.57	0.119	0.746	2.672			3.104	10.367	0.159	100	180	617	0.993571	0.0060226	0.374338	0	0	0.0496893	0.00167754	0.0185091	0.0476484	0	0	0.100163	0.220116	0.00224031	1.81397	0.547731	0.00332011	0.206363	0	0	0.0273925	0.000924784	0.0102036	0.0262674	0	0	0.0552175	0.121344	0.00123503	1
PRO1-4_gl10_1	trachyte	Forni et al. 2016	59.722	0.389	19.092			3.574	0.2	0.743	2.672			3.107	10.37	0.131	100	180	617	0.99397	0.00487067	0.374495	0	0	0.049745	0.00281939	0.0184347	0.0476484	0	0	0.10026	0.220179	0.00184579	1.81427	0.547863	0.00268465	0.206417	0	0	0.0274188	0.00155401	0.010161	0.0262632	0	0	0.0552619	0.12136	0.00101738	1
PRO1-4_gl10_2	trachyte	Forni et al. 2016	59.83	0.449	19.115			3.36	0.09	0.814	2.679			3.104	10.396	0.162	99.999	180	617	0.995768	0.00562193	0.374946	0	0	0.0467664	0.00126872	0.0201963	0.0477733	0	0	0.100163	0.220731	0.00228258	1.81552	0.548476	0.0030966	0.206523	0	0	0.0257593	0.000698822	0.0111243	0.0263139	0	0	0.0551706	0.12158	0.00125726	1
PRO1-4_gl10_3	trachyte	Forni et al. 2016	60.056	0.271	19.17			3.262	0.034	0.772	2.692			3.11	10.445	0.188	100	180	617	0.999529	0.00339319	0.376025	0	0	0.0454024	0.000479296	0.0191542	0.0480051	0	0	0.100357	0.221772	0.00264892	1.81677	0.55017	0.00186771	0.206975	0	0	0.0249908	0.000263818	0.010543	0.0264234	0	0	0.0552392	0.122069	0.00145804	1
PRO1-4_gl11_1	trachyte	Forni et al. 2016	59.881	0.36	19.129			3.408	0.159	0.712	2.682			3.109	10.406	0.153	99.999	180	617	0.996616	0.00450756	0.375221	0	0	0.0474345	0.00224141	0.0176656	0.0478268	0	0	0.100324	0.220944	0.00215577	1.81494	0.549119	0.00248359	0.20674	0	0	0.0261356	0.00123498	0.00973343	0.0263517	0	0	0.0552771	0.121736	0.00118779	1
PRO1-4_gl12_1	trachyte	Forni et al. 2016	59.837	0.339	19.119			3.476	0.099	0.783	2.679			3.107	10.396	0.164	99.999	180	617	0.995884	0.00424462	0.375025	0	0	0.048381	0.0013956	0.0194272	0.0477733	0	0	0.10026	0.220731	0.00231076	1.81543	0.548566	0.00233808	0.206576	0	0	0.0266498	0.000768741	0.0107011	0.0263151	0	0	0.0552265	0.121586	0.00127284	1
PRO1-4_gl12_2	trachyte	Forni et al. 2016	59.89	0.438	19.132			3.331	0.049	0.896	2.681			3.104	10.405	0.073	99.999	180	617	0.996766	0.0054842	0.37528	0	0	0.0463628	0.00069075	0.0222308	0.0478089	0	0	0.100163	0.220922	0.00102857	1.81674	0.548657	0.00301871	0.206568	0	0	0.0255198	0.000380214	0.0122367	0.0263158	0	0	0.0551335	0.121604	0.000566164	1
PRO1-4_gl13_1	trachyte	Forni et al. 2016	59.678	0.402	19.082			3.611	0.065	0.891	2.669			3.1	10.36	0.141	99.999	180	617	0.993238	0.00503344	0.374299	0	0	0.05026	0.000916301	0.0221068	0.0475949	0	0	0.100034	0.219967	0.00198669	1.81544	0.547107	0.00277258	0.206176	0	0	0.0276848	0.000504728	0.0121771	0.0262168	0	0	0.0551019	0.121165	0.00109433	1
PRO1-4_gl13_2	trachyte	Forni et al. 2016	59.925	0.394	19.139			3.323	0.18	0.696	2.684			3.111	10.415	0.133	100	180	617	0.997349	0.00493328	0.375417	0	0	0.0462514	0.00253745	0.0172686	0.0478624	0	0	0.100389	0.221135	0.00187397	1.81502	0.549498	0.00271803	0.206839	0	0	0.0254827	0.00139803	0.00951429	0.0263702	0	0	0.0553102	0.121836	0.00103248	1
PRO1-4_gl13_3	trachyte	Forni et al. 2016	59.871	0.366	19.126			3.322	0.215	0.752	2.681			3.108	10.404	0.155	100	180	617	0.99645	0.00458269	0.375162	0	0	0.0462375	0.00303084	0.018658	0.0478089	0	0	0.100292	0.220901	0.00218395	1.81531	0.548915	0.00252447	0.206666	0	0	0.0254709	0.0016696	0.0102782	0.0263365	0	0	0.0552481	0.121688	0.00120308	1
PRO1-4_gl14_1	trachyte	Forni et al. 2016	59.711	0.467	19.085			3.418	0.124	0.84	2.672			3.1	10.372	0.21	99.999	180	617	0.993787	0.00584731	0.374358	0	0	0.0475737	0.00174802	0.0208414	0.0476484	0	0	0.100034	0.220222	0.0029589	1.81502	0.547536	0.00322163	0.206256	0	0	0.0262111	0.000963087	0.0114827	0.0262523	0	0	0.0551146	0.121333	0.00163023	1
PRO1-4_gl14_2	trachyte	Forni et al. 2016	59.793	0.426	19.106			3.473	0.074	0.768	2.677			3.105	10.389	0.189	100	180	617	0.995152	0.00533395	0.37477	0	0	0.0483392	0.00104317	0.019055	0.0477376	0	0	0.100195	0.220583	0.00266301	1.81487	0.548332	0.00293902	0.206499	0	0	0.0266351	0.000574792	0.0104994	0.0263036	0	0	0.055208	0.121542	0.00146733	1
PRO1-4_gl15_1	trachyte	Forni et al. 2016	59.838	0.352	19.119			3.42	0.085	0.848	2.679			3.104	10.396	0.158	99.999	180	617	0.995901	0.00440739	0.375025	0	0	0.0476015	0.00119824	0.0210399	0.0477733	0	0	0.100163	0.220731	0.00222622	1.81607	0.548383	0.00242689	0.206504	0	0	0.0262114	0.000659799	0.0115854	0.0263059	0	0	0.0551539	0.121544	0.00122585	1
PRO1-4_gl16_1	trachyte	Forni et al. 2016	59.874	0.383	19.128			3.407	0.069	0.819	2.681			3.106	10.403	0.129	99.999	180	617	0.9965	0.00479554	0.375201	0	0	0.0474206	0.000972689	0.0203204	0.0478089	0	0	0.100228	0.22088	0.00181761	1.81594	0.54875	0.0026408	0.206615	0	0	0.0261135	0.000535638	0.01119	0.0263273	0	0	0.0551931	0.121634	0.00100092	1
PRO1-4_gl17_1	trachyte	Forni et al. 2016	59.74	0.268	19.097			3.661	0.045	0.851	2.673			3.103	10.374	0.188	100	180	617	0.99427	0.00335563	0.374593	0	0	0.0509559	0.000634362	0.0211143	0.0476663	0	0	0.100131	0.220264	0.00264892	1.81563	0.547616	0.00184819	0.206315	0	0	0.0280651	0.000349389	0.0116292	0.0262532	0	0	0.0551493	0.121315	0.00145895	1
PRO1-4_gl17_2	trachyte	Forni et al. 2016	59.817	0.237	19.115			3.394	0.209	0.867	2.678			3.103	10.392	0.189	100.001	180	617	0.995551	0.00296748	0.374946	0	0	0.0472397	0.00294626	0.0215113	0.0477554	0	0	0.100131	0.220646	0.00266301	1.81636	0.548103	0.00163375	0.206427	0	0	0.0260079	0.00162207	0.0118431	0.0262919	0	0	0.0551273	0.121477	0.00146613	1
PRO1-4_gl17_3	trachyte	Forni et al. 2016	59.761	0.329	19.103			3.546	0.114	0.869	2.673			3.104	10.377	0.123	99.999	180	617	0.994619	0.00411941	0.374711	0	0	0.0493553	0.00160705	0.0215609	0.0476663	0	0	0.100163	0.220328	0.00173307	1.81586	0.547739	0.00226857	0.206354	0	0	0.0271801	0.000885007	0.0118736	0.0262499	0	0	0.0551601	0.121335	0.000954407	1
PRO1-4_gl18_1	trachyte	Forni et al. 2016	59.752	0.313	19.099			3.509	0.174	0.821	2.674			3.104	10.377	0.177	100	180	617	0.994469	0.00391907	0.374632	0	0	0.0488403	0.00245287	0.02037	0.0476841	0	0	0.100163	0.220328	0.00249393	1.81535	0.547811	0.00215885	0.206369	0	0	0.026904	0.00135118	0.0112209	0.0262671	0	0	0.0551756	0.121369	0.0013738	1
PRO1-4_gl18_2	trachyte	Forni et al. 2016	59.953	0.36	19.144			3.229	0.074	0.821	2.687			3.105	10.424	0.203	100	180	617	0.997815	0.00450756	0.375515	0	0	0.0449431	0.00104317	0.02037	0.0479159	0	0	0.100195	0.221326	0.00286027	1.81649	0.549309	0.00248147	0.206726	0	0	0.0247417	0.000574279	0.0112139	0.0263783	0	0	0.0551588	0.121842	0.00157461	1
PRO1-4_gl19_1	trachyte	Forni et al. 2016	59.959	0.333	19.149			3.43	0.026	0.756	2.685			3.11	10.421	0.13	99.999	180	617	0.997915	0.00416949	0.375613	0	0	0.0477407	0.00036652	0.0187573	0.0478803	0	0	0.100357	0.221262	0.0018317	1.81589	0.549545	0.00229611	0.206848	0	0	0.0262905	0.00020184	0.0103295	0.0263673	0	0	0.0552658	0.121848	0.00100871	1
PRO1-4_gl20_1	trachyte	Forni et al. 2016	59.602	0.327	19.066			3.79	0.193	0.792	2.664			3.105	10.341	0.12	100	180	617	0.991973	0.00409437	0.373985	0	0	0.0527514	0.00272071	0.0196505	0.0475058	0	0	0.100195	0.219563	0.0016908	1.81413	0.546804	0.00225693	0.206151	0	0	0.0290781	0.00149973	0.0108319	0.0261865	0	0	0.0552305	0.12103	0.000932018	1
PRO1-4_gl21_2	trachyte	Forni et al. 2016	59.875	0.245	19.129			3.499	0.035	0.84	2.681			3.106	10.404	0.188	100.002	180	617	0.996517	0.00306765	0.375221	0	0	0.0487011	0.000493393	0.0208414	0.0478089	0	0	0.100228	0.220901	0.00264892	1.81643	0.548613	0.00168883	0.206571	0	0	0.0268115	0.000271628	0.0114738	0.0263203	0	0	0.0551785	0.121613	0.00145831	1
PRO1-4_gl22_1	trachyte	Forni et al. 2016	59.828	0.362	19.117			3.452	0.16	0.792	2.677			3.107	10.392	0.111	99.998	180	617	0.995734	0.0045326	0.374985	0	0	0.0480469	0.00225551	0.0196505	0.0477376	0	0	0.10026	0.220646	0.00156399	1.81541	0.548489	0.00249673	0.206557	0	0	0.0264661	0.00124242	0.0108242	0.0262957	0	0	0.0552271	0.121541	0.000861507	1
PRO1-4_gl22_2	trachyte	Forni et al. 2016	59.751	0.306	19.099			3.607	0.115	0.767	2.674			3.106	10.378	0.198	100.001	180	617	0.994453	0.00383143	0.374632	0	0	0.0502043	0.00162115	0.0190302	0.0476841	0	0	0.100228	0.220349	0.00278982	1.81482	0.547961	0.00211119	0.206429	0	0	0.0276635	0.000893281	0.010486	0.0262748	0	0	0.0552272	0.121416	0.00153724	1
PRO1-4_gl23_1	trachyte	Forni et al. 2016	59.845	0.461	19.119			3.463	0.09	0.701	2.679			3.109	10.398	0.136	100.001	180	617	0.996017	0.00577218	0.375025	0	0	0.0482	0.00126872	0.0173926	0.0477733	0	0	0.100324	0.220774	0.00191624	1.81446	0.548932	0.00318121	0.206686	0	0	0.0265644	0.000699228	0.00958556	0.0263291	0	0	0.0552915	0.121674	0.00105609	1
PRO1-4_gl23_2	trachyte	Forni et al. 2016	59.623	0.376	19.067			3.531	0.179	0.918	2.667			3.098	10.35	0.19	99.999	180	617	0.992322	0.0047079	0.374005	0	0	0.0491465	0.00252335	0.0227767	0.0475593	0	0	0.0999695	0.219755	0.0026771	1.81544	0.546601	0.00259325	0.206013	0	0	0.0270714	0.00138994	0.0125461	0.0261971	0	0	0.0550662	0.121047	0.00147463	1
PRO1-4_gl24_2	trachyte	Forni et al. 2016	60.206	0.39	18.818			3.496	0.145	0.75	2.773			3.306	9.956	0.16	100	180	617	1.00203	0.00488319	0.36912	0	0	0.0486594	0.00204406	0.0186084	0.0494495	0	0	0.106681	0.211389	0.0022544	1.81512	0.552045	0.00269029	0.203359	0	0	0.0268079	0.00112613	0.0102519	0.0272432	0	0	0.0587739	0.11646	0.00124202	1
PRO1-4_gl25_1	trachyte	Forni et al. 2016	60.732	0.44	18.753			3.445	0.044	0.793	2.702			3.207	9.72	0.163	99.999	180	617	1.01078	0.00550924	0.367845	0	0	0.0479495	0.000620265	0.0196753	0.0481834	0	0	0.103487	0.206378	0.00229667	1.81272	0.557603	0.0030392	0.202924	0	0	0.0264516	0.000342173	0.010854	0.0265807	0	0	0.0570891	0.11385	0.00126697	1
PRO1-4_gl25_2	trachyte	Forni et al. 2016	60.263	0.415	19.19			3.62	0.064	0.69	2.731			3.121	9.763	0.144	100.001	180	617	1.00297	0.00519622	0.376417	0	0	0.0503853	0.000902204	0.0171197	0.0487005	0	0	0.100712	0.207291	0.00202896	1.81173	0.553601	0.0028681	0.207767	0	0	0.0278106	0.00049798	0.00944939	0.0268807	0	0	0.0555888	0.114416	0.0011199	1
PRO1-4_gl27_2	trachyte	Forni et al. 2016	60.53	0.37	19.024			3.398	0.095	0.655	2.657			2.987	10.113	0.172	100.001	180	617	1.00742	0.00463277	0.373161	0	0	0.0472953	0.00133921	0.0162513	0.0473809	0	0	0.0963876	0.214722	0.00242348	1.81101	0.556273	0.00255811	0.206051	0	0	0.0261154	0.000739481	0.00897362	0.0261627	0	0	0.0532231	0.118565	0.00133819	1
PRO1-4_gl29_2	trachyte	Forni et al. 2016	60.725	0.48	19.008			3.251	0.055	0.804	2.468			2.844	10.17	0.196	100.001	180	617	1.01066	0.00601008	0.372847	0	0	0.0452493	0.000775331	0.0199482	0.0440106	0	0	0.0917732	0.215933	0.00276164	1.80997	0.558386	0.00332054	0.205996	0	0	0.025	0.000428367	0.0110213	0.0243156	0	0	0.0507042	0.119302	0.00152579	1
PRO1-4_gl31_1	trachyte	Forni et al. 2016	60.73	0.348	18.868			3.495	0.113	0.706	2.425			3.1	10.024	0.191	100	180	617	1.01075	0.00435731	0.370101	0	0	0.0486454	0.00159295	0.0175167	0.0432438	0	0	0.100034	0.212833	0.00269119	1.81176	0.55788	0.00240501	0.204277	0	0	0.0268498	0.000879229	0.00966832	0.0238684	0	0	0.0552137	0.117473	0.0014854	1
PRO1-4_gl31_2	trachyte	Forni et al. 2016	60.615	0.288	19.04			3.39	0.101	0.744	2.471			3.173	10.001	0.178	100.001	180	617	1.00883	0.00360605	0.373475	0	0	0.047184	0.00142379	0.0184595	0.0440641	0	0	0.10239	0.212344	0.00250802	1.81429	0.556049	0.00198758	0.205852	0	0	0.0260069	0.000784766	0.0101745	0.0242873	0	0	0.0564352	0.11704	0.00138237	1
PRO1-4_gl32_1	trachyte	Forni et al. 2016	59.99	0.296	19.435			3.321	0.199	0.8	2.535			3.197	10.029	0.198	100	180	617	0.998431	0.00370622	0.381223	0	0	0.0462236	0.00280529	0.0198489	0.0452054	0	0	0.103164	0.212939	0.00278982	1.81634	0.549695	0.00204049	0.209886	0	0	0.0254488	0.00154448	0.010928	0.0248882	0	0	0.0567979	0.117235	0.00153596	1
PRO1-4_gl33_1	trachyte	Forni et al. 2016	60.74	0.365	18.95			3.019	0.095	0.771	2.499			3.164	10.229	0.168	100	180	617	1.01091	0.00457017	0.37171	0	0	0.0420202	0.00133921	0.0191294	0.0445634	0	0	0.102099	0.217185	0.00236712	1.8159	0.556702	0.00251675	0.204698	0	0	0.0231402	0.000737492	0.0105344	0.0245407	0	0	0.0562253	0.119602	0.00130356	1
PRO1-4_gl34_1	trachyte	Forni et al. 2016	60.433	0.351	19.159			3.391	0.125	0.834	2.839			2.888	9.827	0.154	100.001	180	617	1.0058	0.00439487	0.375809	0	0	0.0471979	0.00176212	0.0206925	0.0506265	0	0	0.093193	0.20865	0.00216986	1.8103	0.555601	0.0024277	0.207595	0	0	0.0260719	0.000973384	0.0114304	0.0279658	0	0	0.0514793	0.115257	0.00119862	1
PRO1-4_gl35_1	trachyte	Forni et al. 2016	60.146	0.438	19.239			3.555	0.15	0.776	2.514			3.032	9.954	0.197	100.001	180	617	1.00103	0.0054842	0.377378	0	0	0.0494806	0.00211454	0.0192535	0.0448309	0	0	0.0978397	0.211347	0.00277573	1.81153	0.552586	0.00302738	0.20832	0	0	0.0273142	0.00116727	0.0106283	0.0247475	0	0	0.0540094	0.116667	0.00153226	1
PRO1-4_gl36_1	trachyte	Forni et al. 2016	60.99	0.332	18.988			3.225	0.095	0.856	2.137			3.199	9.974	0.203	99.999	180	617	1.01507	0.00415697	0.372455	0	0	0.0448874	0.00133921	0.0212384	0.038108	0	0	0.103229	0.211771	0.00286027	1.81512	0.559233	0.00229019	0.205196	0	0	0.0247297	0.000737808	0.0117008	0.0209948	0	0	0.0568716	0.116671	0.0015758	1
PRO1-4_gl37_1	trachyte	Forni et al. 2016	60.457	0.311	19.221			3.352	0.169	0.811	2.807			3.069	9.63	0.175	100.002	180	617	1.0062	0.00389403	0.377025	0	0	0.0466551	0.00238238	0.0201219	0.0500558	0	0	0.0990337	0.204467	0.00246575	1.8123	0.555206	0.00214866	0.208036	0	0	0.0257435	0.00131456	0.0111029	0.02762	0	0	0.0546452	0.112822	0.00136056	1
PRO1-4_gl38_1	trachyte	Forni et al. 2016	60.284	0.364	19.197			3.522	0.054	0.75	2.503			3.368	9.808	0.152	100.002	180	617	1.00332	0.00455765	0.376555	0	0	0.0490212	0.000761235	0.0186084	0.0446347	0	0	0.108682	0.208247	0.00214168	1.81653	0.552329	0.00250898	0.207293	0	0	0.0269862	0.000419059	0.0102439	0.0245714	0	0	0.0598295	0.11464	0.00117899	1
PRO1-4_gl39_1	trachyte	Forni et al. 2016	60.962	0.286	18.766			3.364	0.154	0.692	2.582			3.042	9.994	0.156	99.998	180	617	1.01461	0.00358101	0.3681	0	0	0.0468221	0.00217093	0.0171693	0.0460435	0	0	0.0981624	0.212196	0.00219804	1.81105	0.560231	0.00197731	0.203252	0	0	0.0258535	0.00119871	0.00948032	0.0254236	0	0	0.0542019	0.117167	0.00121368	1
PRO1-4_gl41_1	trachyte	Forni et al. 2016	60.391	0.277	19.052			3.363	0.095	0.774	2.593			3.159	10.055	0.241	100	180	617	1.0051	0.00346832	0.37371	0	0	0.0468082	0.00133921	0.0192039	0.0462397	0	0	0.101938	0.213491	0.00339569	1.8147	0.553869	0.00191124	0.205935	0	0	0.0257939	0.000737979	0.0105824	0.0254806	0	0	0.0561735	0.117645	0.00187122	1
PRO1-4_gl42_1	trachyte	Forni et al. 2016	60.046	0.463	19.01			3.484	0.04	0.742	2.738			3.214	10.059	0.204	100	180	617	0.999363	0.00579722	0.372887	0	0	0.0484923	0.000563877	0.0184099	0.0488254	0	0	0.103713	0.213576	0.00287436	1.8145	0.550764	0.00319494	0.205504	0	0	0.0267249	0.000310762	0.010146	0.0269084	0	0	0.0571577	0.117705	0.00158411	1
PRO1-4_gl43_1	trachyte	Forni et al. 2016	60.546	0.369	19.291			3.584	0.074	0.726	2.217			2.864	10.07	0.259	100	180	617	1.00768	0.00462025	0.378398	0	0	0.0498842	0.00104317	0.0180129	0.0395346	0	0	0.0924185	0.21381	0.00364931	1.80906	0.557022	0.00255396	0.209169	0	0	0.0275747	0.00057664	0.00995709	0.0218538	0	0	0.0510866	0.118188	0.00201725	1
PRO1-4_gl45_1	trachyte	Forni et al. 2016	60.123	0.357	19.097			3.468	0.135	0.796	2.784			3.144	9.918	0.179	100.001	180	617	1.00064	0.00447	0.374593	0	0	0.0482696	0.00190309	0.0197497	0.0496457	0	0	0.101454	0.210582	0.00252211	1.81383	0.551674	0.00246439	0.20652	0	0	0.0266119	0.00104921	0.0108884	0.0273706	0	0	0.0559334	0.116098	0.00139049	1
PRO1-4_gl46_1	trachyte	Forni et al. 2016	60.519	0.448	18.834			3.725	0.16	0.765	2.573			3.34	9.56	0.074	99.998	180	617	1.00723	0.00560941	0.369434	0	0	0.0518467	0.00225551	0.0189806	0.045883	0	0	0.107779	0.202981	0.00104266	1.81305	0.555548	0.00309391	0.203764	0	0	0.0285965	0.00124404	0.0104689	0.0253071	0	0	0.0594461	0.111956	0.000575088	1
PRO1-4_gl46_2	trachyte	Forni et al. 2016	60.441	0.444	18.934			3.449	0.103	0.759	2.707			2.946	9.974	0.241	99.998	180	617	1.00594	0.00555933	0.371396	0	0	0.0480052	0.00145198	0.0188317	0.0482726	0	0	0.0950646	0.211771	0.00339569	1.80968	0.555863	0.00307199	0.205227	0	0	0.0265268	0.000802341	0.0104061	0.0266746	0	0	0.052531	0.117021	0.0018764	1
PRO1-4_gl48_1	trachyte	Forni et al. 2016	60.428	0.397	18.908			3.428	0.059	0.923	2.588			3.172	9.963	0.135	100.001	180	617	1.00572	0.00497084	0.370886	0	0	0.0477129	0.000831719	0.0229007	0.0461505	0	0	0.102357	0.211538	0.00190215	1.81497	0.554125	0.0027388	0.204348	0	0	0.0262885	0.000458255	0.0126177	0.0254277	0	0	0.0563962	0.116552	0.00104803	1
Carpenter Ridge Tuff
CRT08-11 G4	rhyolite	Bachmann et al. 2014	72.5476		15.2357			0.802407		0.0702106	0.822467			4.54363	5.97793		100			1.20743	0	0.298853	0	0	0.0111684	0	0.00174201	0.0146666	0	0	0.146619	0.126925	0	1.8074	0.668047	0	0.165349	0	0	0.00617923	0	0.000963818	0.00811475	0	0	0.0811211	0.0702252	0	1
CRT08-11 G1	rhyolite	Bachmann et al. 2014	72.7127		14.3844			0.980981		0.15015	0.590591			4.03403	7.14715		100			1.21018	0	0.282154	0	0	0.0136539	0	0.0037254	0.0105317	0	0	0.130174	0.151751	0	1.80217	0.671512	0	0.156564	0	0	0.00757635	0	0.00206718	0.00584391	0	0	0.0722321	0.0842044	0	1
CRT09-5 G2	trachydacite	Bachmann et al. 2014	69.6441		15.7594			2.33584		0.441103	1.53383			5.57393	4.71178		100			1.15911	0	0.309125	0	0	0.0325116	0	0.0109443	0.0273521	0	0	0.179866	0.100042	0	1.81895	0.63724	0	0.169947	0	0	0.0178738	0	0.00601682	0.0150373	0	0	0.0988844	0.055	0	1
CRT09-5 G4	trachydacite	Bachmann et al. 2014	69.7355		16.1391			2.14386		0.631136	3.07554			6.27129	2.00361		100			1.16063	0	0.316572	0	0	0.0298395	0	0.0156592	0.0548445	0	0	0.202368	0.0425412	0	1.82245	0.636849	0	0.173707	0	0	0.0163732	0	0.00859239	0.0300938	0	0	0.111042	0.0233428	0	1
CRT09-5 G3	trachydacite	Bachmann et al. 2014	70.0831		15.574			2.39215		0.50045	2.16195			6.58593	2.70243		100			1.16641	0	0.305489	0	0	0.0332954	0	0.0124168	0.0385529	0	0	0.212522	0.0573789	0	1.82607	0.638757	0	0.167293	0	0	0.0182334	0	0.00679973	0.0211125	0	0	0.116382	0.0314221	0	1
CRT09-5 G9	trachydacite	Bachmann et al. 2014	72.7145		14.6412			1.00351		0.120421	0.82288			3.90366	6.79378		100			1.21021	0	0.287192	0	0	0.0139675	0	0.0029878	0.014674	0	0	0.125967	0.144248	0	1.79924	0.67262	0	0.159618	0	0	0.00776296	0	0.00166059	0.00815565	0	0	0.0700113	0.0801713	0	1
CRT09-5 G6	trachydacite	Bachmann et al. 2014	72.73		14.4			1.16		0.06	0.66			4.6	6.39		100			1.21047	0	0.28246	0	0	0.0161456	0	0.00148867	0.0117694	0	0	0.148438	0.135675	0	1.80644	0.670083	0	0.156363	0	0	0.00893777	0	0.00082409	0.00651526	0	0	0.0821713	0.075106	0	1
CRT09-5 G7	trachydacite	Bachmann et al. 2014	73.7127		14.3631			0.863194		0.130483	0.3513			2.98103	7.59811		100			1.22682	0	0.281737	0	0	0.0120144	0	0.00323743	0.00626455	0	0	0.096195	0.161326	0	1.7876	0.686297	0	0.157607	0	0	0.006721	0	0.00181105	0.00350446	0	0	0.0538125	0.0902472	0	1
CRT11 - 1	rhyolite	new data																129.743	122.029
CRT11 - 2	rhyolite	new data																129.974	124.318
CRT11 - 3	rhyolite	new data																131.512	124.541
CRT11 - 4	rhyolite	new data																135.489	118.955
CRT11 - 5	rhyolite	new data																134.284	124.06
CRT11 - 6	rhyolite	new data																132.881	122.996
CRT11 - 7	rhyolite	new data																135.38	127.011
CRT11 - 8	rhyolite	new data																132.598	121.284
CRT11 - 9	rhyolite	new data																134.608	129.676
CRT11 - 10	rhyolite	new data																131.225	115.094
CRT11 - 11	rhyolite	new data																135.784	115.717
CRT11 - 12	rhyolite	new data																132.576	118.177
CRT11 - 13	rhyolite	new data																134.057	117.296
CRT11 - 14	rhyolite	new data																131.221	117.684
CRT11 - 15	rhyolite	new data																134.882	116.256
CRT11 - 16	rhyolite	new data																128.707	113.636
CRT11 - 17	rhyolite	new data																129.229	119.997
CRT11 - 18	rhyolite	new data																130.866	122.009
CRT11 - 19	rhyolite	new data																131.473	123.105
CRT11 - 20	rhyolite	new data																131.328	116.943
CRT11 - 21	rhyolite	new data																134.227	115.865
CRT11 - 22	rhyolite	new data																129.662	117.988
CRT11 - 23	rhyolite	new data																135.286	120.293
CRT11 - 25	rhyolite	new data																109.148	134.505
CRT11 - 26	rhyolite	new data																110.606	144.388
CRT11 - 28	rhyolite	new data																107.963	131.638
CRT11 - 30	rhyolite	new data																114.549	133.11
CRT11 - 31	rhyolite	new data																134.843	116.089
CRT11 - 32	rhyolite	new data																133.896	113.802
CRT11 - 33	rhyolite	new data																130.544	112.2
CRT11 - 34	rhyolite	new data																133.59	118.206
CRT11 - 35	rhyolite	new data																128.656	113.51
CRT11 - 36	rhyolite	new data																134.354	120.92
CRT11 - 37	rhyolite	new data																130.09	126.13
CRT11 - 38	rhyolite	new data																130.569	109.375
CRT11 - 39	rhyolite	new data																135.534	118.137
CRT11 - 40	rhyolite	new data																134.56	119.061
CRT11 - 41	rhyolite	new data																117.2	116.265
CRT11 - 42	rhyolite	new data																119.427	116.856
CRT11 - 43	rhyolite	new data																114.24	119.682
CRT11 - 44	rhyolite	new data																113.075	295.102
CRT11 - 45	rhyolite	new data																118.566	112.581
CRT11 - 46	rhyolite	new data																105.556	124.389
CRT11 - 47	rhyolite	new data																106.526	123.462
CRT11 - 48	rhyolite	new data																106.939	121.245
CRT11 - 49	rhyolite	new data																109.701	116.867
CRT11 - 50	rhyolite	new data																116.335	119.729
CRT11 - 51	rhyolite	new data																116.761	118.764
CRT11 - 52	rhyolite	new data																113.883	149.024
CRT11 - 53	rhyolite	new data																117.654	143.356
CRT7 - 1	trachydacite	new data																668.436	2434.17
CRT7 - 2	trachydacite	new data																679.52	2998.51
CRT7 - 4	trachydacite	new data																651.854	3684.65
CRT7 - 5	trachydacite	new data																569.356	4539.41
CRT7 - 6	trachydacite	new data																649.041	4294.25
CRT7 - 7	trachydacite	new data																640.671	4255.09
CRT7 - 8	trachydacite	new data																665.336	3401.98
CRT7 - 9	trachydacite	new data																567.493	4369.1
CRT7 - 10	trachydacite	new data																618.159	3881.23
CRT7 - 11	trachydacite	new data																681.618	4064.02
CRT7 - 12	trachydacite	new data																616.199	4717.3
CRT7 - 21	trachydacite	new data																647.265	3402.93
CRT7 - 22	trachydacite	new data																627.368	5315.7
CRT7 - 23	trachydacite	new data																680.864	4093.88
CRT7 - 24	trachydacite	new data																613.814	5322.74
CRT7 - 25	trachydacite	new data																626.804	4939.6
CRT7 - 26	trachydacite	new data																557.425	4119.49
CRT7 - 27	trachydacite	new data																607.236	5556.2
CRT7 - 28	trachydacite	new data																548.272	4464.04
CRT7 - 29	trachydacite	new data																631.217	3898.72
CRT7 - 30	trachydacite	new data																573.419	5229.19
CRT7 - 31	trachydacite	new data																629.325	4410.03
CRT7 - 32	trachydacite	new data																626.426	4787.8
CRT7 - 33	trachydacite	new data																654.631	3416.23
CRT7 - 34	trachydacite	new data																616.496	4477.36
CRT7 - 35	trachydacite	new data																639.223	3592.38
CRT7 - 43	trachydacite	new data																691.645	4248.2
CRT7 - 44	trachydacite	new data																598.167	6463.14
CRT7 - 45	trachydacite	new data																612.575	4849.36
Lipari rhyolites
LIP97	rhyolite	Forni et al. 2015	75.12	0.09	11.99			1.37669	0.07	0.64	0.86			3.89	4.37	0.01	98.4167	123	8	1.25024	0.00112689	0.235187	0	0	0.0191616	0.000986786	0.0158792	0.0153359	0	0	0.125527	0.0927853	0.0001409	1.75637	0.711832	0.000641601	0.133905	0	0	0.0109098	0.000561831	0.00904088	0.0087316	0	0	0.0714692	0.0528277	8.02222e-05	1
LIP290	rhyolite	Forni et al. 2015	75.73	0.11	11.98			1.43968	0.07	0.1	0.58			3.91	4.87	0.04	98.8297	132	9	1.2604	0.00137731	0.234991	0	0	0.0200383	0.000986786	0.00248112	0.0103428	0	0	0.126172	0.103401	0.000563601	1.76075	0.715829	0.000782229	0.133461	0	0	0.0113805	0.000560435	0.00140913	0.00587411	0	0	0.0716581	0.0587258	0.000320091	1
LIP294	rhyolite	Forni et al. 2015	73.56	0.12	12.01			1.62864	0.09	0.12	0.74			3.95	5.12	0.02	97.3586	123	8.5	1.22428	0.00150252	0.23558	0	0	0.0226683	0.00126872	0.00297734	0.013196	0	0	0.127463	0.108709	0.0002818	1.73793	0.704449	0.000864548	0.135552	0	0	0.0130433	0.000730022	0.00171316	0.00759298	0	0	0.0733418	0.0625513	0.000162147	1
LIP259	rhyolite	Forni et al. 2015	74.19	0.09	11.76			1.52066	0.08	0.01	0.7			3.55	4.67	0.01	96.5807	157	16.1	1.23477	0.00112689	0.230676	0	0	0.0211655	0.00112775	0.000248112	0.0124827	0	0	0.114555	0.099155	0.0001409	1.71544	0.719794	0.000656909	0.13447	0	0	0.0123382	0.000657413	0.000144634	0.00727669	0	0	0.0667787	0.0578014	8.21363e-05	1
LIP296	rhyolite	Forni et al. 2015	73.29	0.14	11.99			1.73661	0.11	0.12	0.82			4.66	5.64	0	98.5066	155	15	1.21979	0.00175294	0.235187	0	0	0.0241712	0.00155066	0.00297734	0.0146226	0	0	0.150374	0.11975	0	1.77017	0.689078	0.000990265	0.132861	0	0	0.0136547	0.000875995	0.00168195	0.00826058	0	0	0.0849487	0.067649	0	1
LIP273A	rhyolite	Forni et al. 2015	74.5	0.12	12.21			1.8176	0.11	0.13	0.77			4.47	5.15	0	99.2776	170	16.3	1.23992	0.00150252	0.239503	0	0	0.0252984	0.00155066	0.00322545	0.013731	0	0	0.144243	0.109346	0	1.77832	0.697243	0.000844908	0.134679	0	0	0.014226	0.00087198	0.00181376	0.00772133	0	0	0.0811115	0.0614885	0	1
LIP289	mingled rhyolite	Forni et al. 2015	72.75	0.15	12.93			2.10553	0.1	0.56	1.56			4.2	4.6	0.04	98.9955	150	84.3	1.2108	0.00187815	0.253626	0	0	0.029306	0.00140969	0.0138943	0.0278187	0	0	0.13553	0.0976687	0.000563601	1.77249	0.683105	0.00105961	0.14309	0	0	0.0165338	0.000795317	0.00783882	0.0156947	0	0	0.0764629	0.0551024	0.00031797	1
LIP288A	mingled rhyolite	Forni et al. 2015	66.92	0.31	14.66			3.56321	0.12	0.76	3.22			4.01	4.73	0.17	98.4632	126	398	1.11377	0.00388151	0.28756	0	0	0.0495948	0.00169163	0.0188565	0.0574206	0	0	0.129399	0.100429	0.0023953	1.765	0.631031	0.00219916	0.162924	0	0	0.0280991	0.000958434	0.0106836	0.032533	0	0	0.0733139	0.0569003	0.00135711	1
LIP315 gmc	high-K enclave groundmass	Forni et al. 2015	58.29	0.54	16.72			6.15463	0.12	2.12	4.58			3.82	5.41	0.42	98.1746	168.6	784	0.970137	0.00676134	0.327968	0	0	0.0856637	0.00169163	0.0525997	0.0816728	0	0	0.123268	0.114867	0.00591781	1.77055	0.547931	0.00381879	0.185235	0	0	0.0483827	0.00095543	0.0297082	0.0461286	0	0	0.0696213	0.0648765	0.00334236	1
LIP315 gmf *	high-K enclave groundmass	Forni et al. 2015	58.5	0.53	16.94			5.80371	0.11	1.98	4.49			3.89	5.47	0.42	98.1337	188.7	944.3	0.973632	0.00663613	0.332283	0	0	0.0807794	0.00155066	0.0491261	0.0800679	0	0	0.125527	0.116141	0.00591781	1.77166	0.549559	0.00374571	0.187555	0	0	0.0455953	0.00087526	0.0277289	0.0451937	0	0	0.0708525	0.0655548	0.00334026	1
LIP319 gmc	high-K enclave groundmass	Forni et al. 2015	58.05	0.56	17.29			6.19062	0.12	1.99	4.22			4.1	5.85	0.23	98.6006	193.5	889.6	0.966143	0.00701176	0.339148	0	0	0.0861647	0.00169163	0.0493743	0.0752531	0	0	0.132303	0.124209	0.0032407	1.78454	0.541396	0.00392917	0.190048	0	0	0.048284	0.000947938	0.0276678	0.0421695	0	0	0.0741385	0.0696029	0.00181599	1
LIP319 gmf*	high-K enclave groundmass	Forni et al. 2015	59.15	0.52	16.85			5.79471	0.11	1.73	4.12			3.96	5.72	0.42	98.3747	177.8	946	0.98445	0.00651092	0.330518	0	0	0.0806542	0.00155066	0.0429234	0.0734699	0	0	0.127785	0.121449	0.00591781	1.77523	0.554548	0.00366765	0.186183	0	0	0.0454331	0.0008735	0.0241791	0.0413861	0	0	0.0719825	0.0684131	0.00333355	1
LIP310B	low-K enclave	Forni et al. 2015	57.72	0.51	14.88			6.34359	0.15	3.71	6.61			4.02	4.29	0.27	98.5036	182	556	0.96065	0.00638571	0.291875	0	0	0.0882938	0.00211454	0.0920495	0.117873	0	0	0.129722	0.0910867	0.0038043	1.78385	0.538525	0.00357973	0.163621	0	0	0.0494961	0.00118538	0.0516015	0.0660776	0	0	0.0727198	0.0510617	0.00213263	1
LIP310C	low-K enclave	Forni et al. 2015	59.97	0.48	14.77			6.06465	0.13	3.18	5.55			3.89	4.21	0.22	98.4647	175	557	0.998098	0.00601008	0.289718	0	0	0.0844114	0.0018326	0.0788996	0.0989704	0	0	0.125527	0.0893881	0.0030998	1.77595	0.562007	0.00338414	0.163134	0	0	0.0475302	0.0010319	0.0444266	0.055728	0	0	0.0706812	0.0503324	0.00174543	1
LIP310D	low-K enclave	Forni et al. 2015	58.88	0.5	15.01			5.92068	0.14	2.79	5.4			4.56	4.68	0.27	98.1507	171	561	0.979956	0.0062605	0.294425	0	0	0.0824075	0.00197357	0.0692232	0.0962955	0	0	0.147147	0.0993673	0.0038043	1.78086	0.550271	0.00351544	0.165328	0	0	0.046274	0.00110821	0.0388707	0.0540724	0	0	0.0826268	0.0557973	0.00213622	1
LIP311	low-K enclave	Forni et al. 2015	63.24	0.38	14.76			4.81393	0.13	2.43	4.51			4.15	4.3	0.22	98.9339	175	453	1.05252	0.00475798	0.289522	0	0	0.0670031	0.0018326	0.0602912	0.0804246	0	0	0.133917	0.091299	0.0030998	1.78467	0.589758	0.00266603	0.162227	0	0	0.0375437	0.00102686	0.0337829	0.0450642	0	0	0.0750372	0.0511574	0.00173691	1
LIP314	high-K enclave	Forni et al. 2015	56.07	0.55	16.18			6.49656	0.13	3.31	6.35			3.83	5.25	0.37	98.5366	203.2	891.2	0.933189	0.00688655	0.317375	0	0	0.0904228	0.0018326	0.082125	0.113236	0	0	0.12359	0.11147	0.00521331	1.78534	0.522695	0.00385728	0.177767	0	0	0.0506474	0.00102647	0.0459996	0.0634256	0	0	0.0692251	0.0624361	0.00292006	1
LIP315	high-K enclave	Forni et al. 2015	55.54	0.58	15.87			6.7305	0.14	3.83	7.05			3.55	4.93	0.39	98.6105	203.3	876.7	0.924368	0.00726218	0.311295	0	0	0.0936791	0.00197357	0.0950268	0.125719	0	0	0.114555	0.104675	0.00549511	1.78405	0.518129	0.00407062	0.174488	0	0	0.0525093	0.00110623	0.0532647	0.0704684	0	0	0.0642107	0.0586729	0.00308013	1
LIP318	high-K enclave	Forni et al. 2015	56.36	0.56	14.9			6.85648	0.14	4.02	7.35			3.6	4.7	0.34	98.8265	176.9	767.6	0.938015	0.00701176	0.292268	0	0	0.0954324	0.00197357	0.099741	0.131069	0	0	0.116169	0.0997919	0.0047906	1.78626	0.525128	0.00392538	0.16362	0	0	0.0534258	0.00110486	0.0558378	0.0733761	0	0	0.0650345	0.0558663	0.00268192	1
LIP319	high-K enclave	Forni et al. 2015	55.65	0.58	15.61			6.87447	0.14	3.79	6.94			3.64	5.05	0.38	98.6545	198.4	864.6	0.926199	0.00726218	0.306195	0	0	0.0956829	0.00197357	0.0940344	0.123758	0	0	0.117459	0.107223	0.00535421	1.78514	0.518838	0.00406813	0.171524	0	0	0.0535996	0.00110555	0.0526762	0.0693265	0	0	0.0657984	0.0600643	0.00299932	1
[truncated: 5 more columns]

## Sheet: const
Label	molecular weight
mw_Al2O3	101.961
mw_BaO	153.33
mw_CaO	56.0774
mw_Cl	35.45
mw_Cr2O3	151.99
mw_F	19
mw_Fe2O3	159.69
mw_FeO	71.8464
mw_K2O	94.196
mw_MgO	40.3044
mw_MnO	70.9374
mw_Na2O	61.9789
mw_P2O5	141.945
mw_SiO2	60.0843
mw_SrO	103.619
mw_TiO2	79.8658
mw_V2O5	181.88
zircon_Zr	497657
